# Supplementary material for: Micro‐Gel Ensembles for Accelerated Healing of Chronic Wound via pH Regulation
Source: PubMed Central journal article supplement (PMC9353480; doi:10.1002/advs.202201254), 2022-05-21
Supplement: ADVS-9-2201254-s001.pdf [file ADVS-9-2201254-s001.pdf]

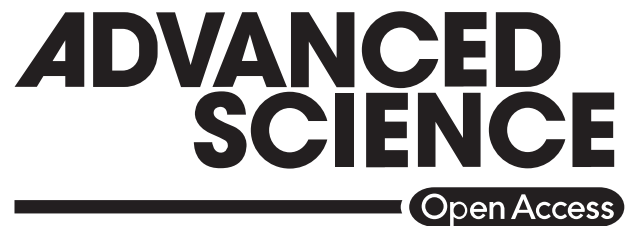

## Supporting Information

for *Adv. Sci.*, DOI 10.1002/adv.202201254

Micro-Gel Ensembles for Accelerated Healing of Chronic Wound via pH Regulation

*Tingting Cui, Jiafei Yu, Cai-Feng Wang\*, Su Chen\*, Qing Li, Kun Guo, Renkun Qing, Gefei Wang\* and Jianan Ren*

## Supporting Information

### **Micro-Gel Ensembles for Accelerated Healing of Chronic Wound via pH Regulation**

*Tingting Cui, Jiafei Yu, Cai-Feng Wang\*, Su Chen\*, Qing Li, Kun Guo, Renkun Qing, Gefei Wang\*, Jianan Ren*

Dr. T. Cui, Prof. C.-F. Wang, Prof. S. Chen, Dr. Q. Li, R. Qing  
State Key Laboratory of Materials-Oriented Chemical Engineering, College of Chemical Engineering, Jiangsu Key Laboratory of Fine Chemicals and Functional Polymer Materials, Nanjing Tech University, Nanjing 210009, P. R. China.  
E-mail: chensu@njtech.edu.cn, caifengwang@njtech.edu.cn  
J. Yu, K. Guo, Prof. G. Wang, Prof. J. Ren  
Department of General Surgery, Jinling Hospital, Nanjing Medical University, Nanjing 210002, China.  
E-mail: Gefei\_W@163.com

## Supporting Figures

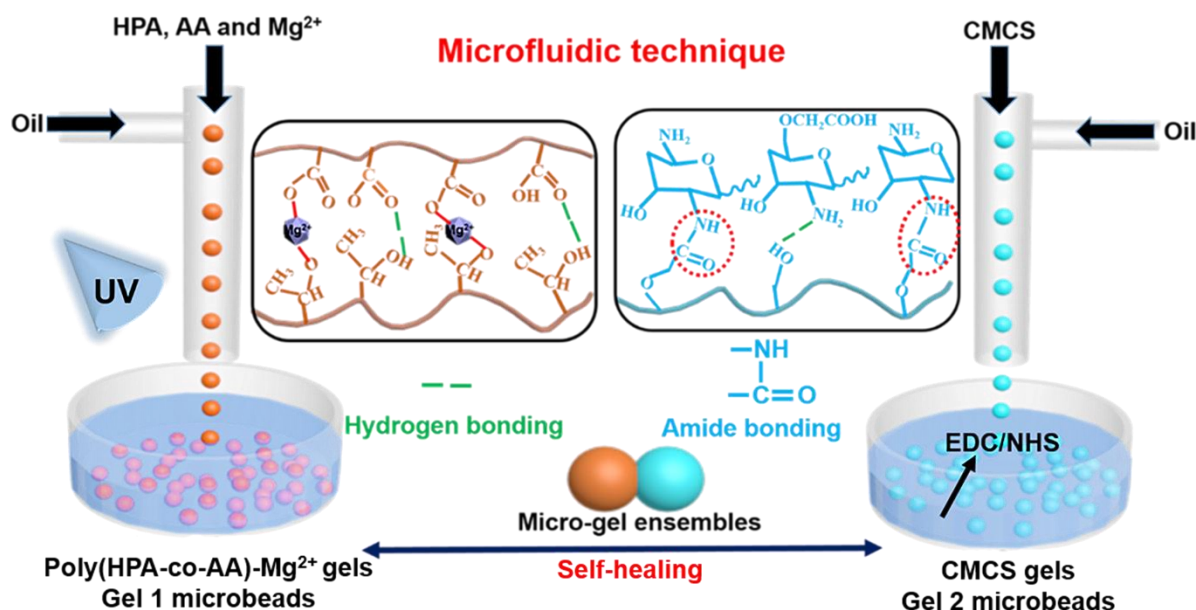

**Figure S1.** Preparation of Gel 1 and Gel 2 microbeads via microfluidic technique.

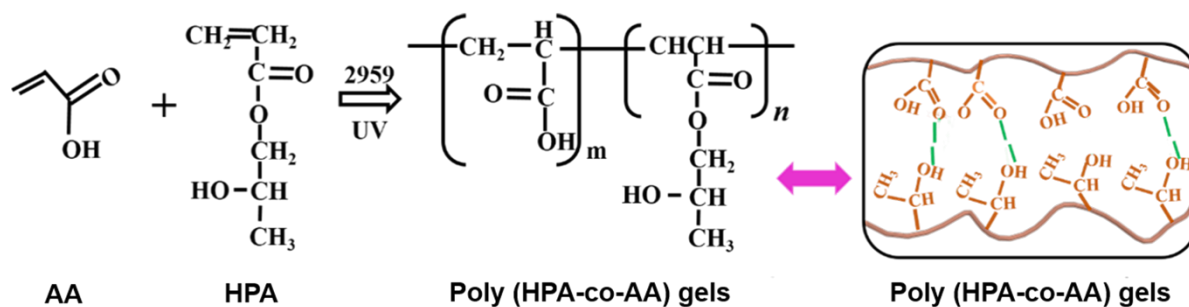

**Figure S2.** Schematic synthesis of poly (HPA-co-AA) gels.

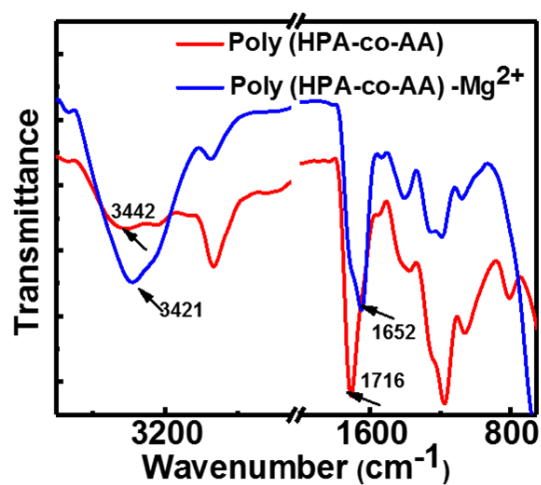

**Figure S3.** IR spectra of poly (HPA-co-AA) gel and poly (HPA-co-AA)- $Mg^{2+}$  gel.

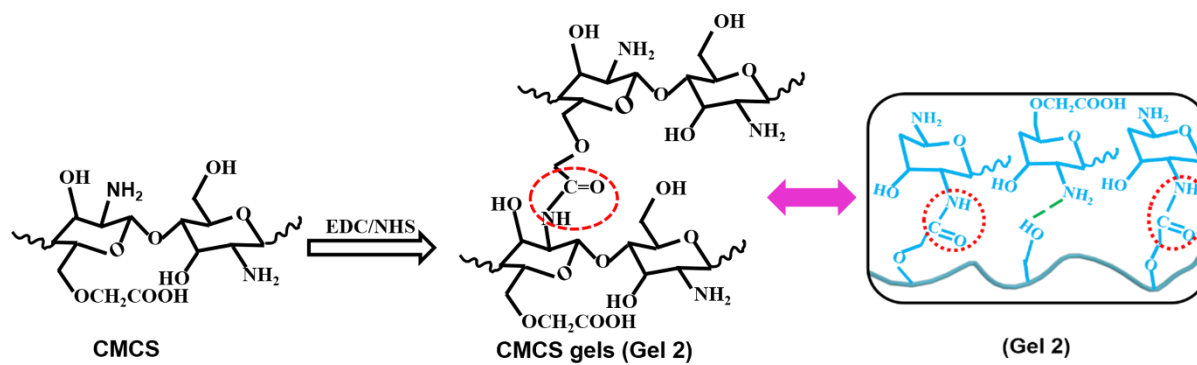

**Figure S4.** Schematic synthesis of CMCS gel (Gel 2).

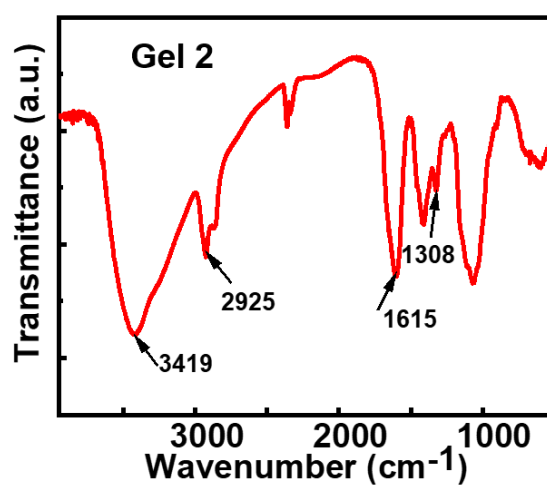

**Figure S5.** IR spectrum of Gel 2.

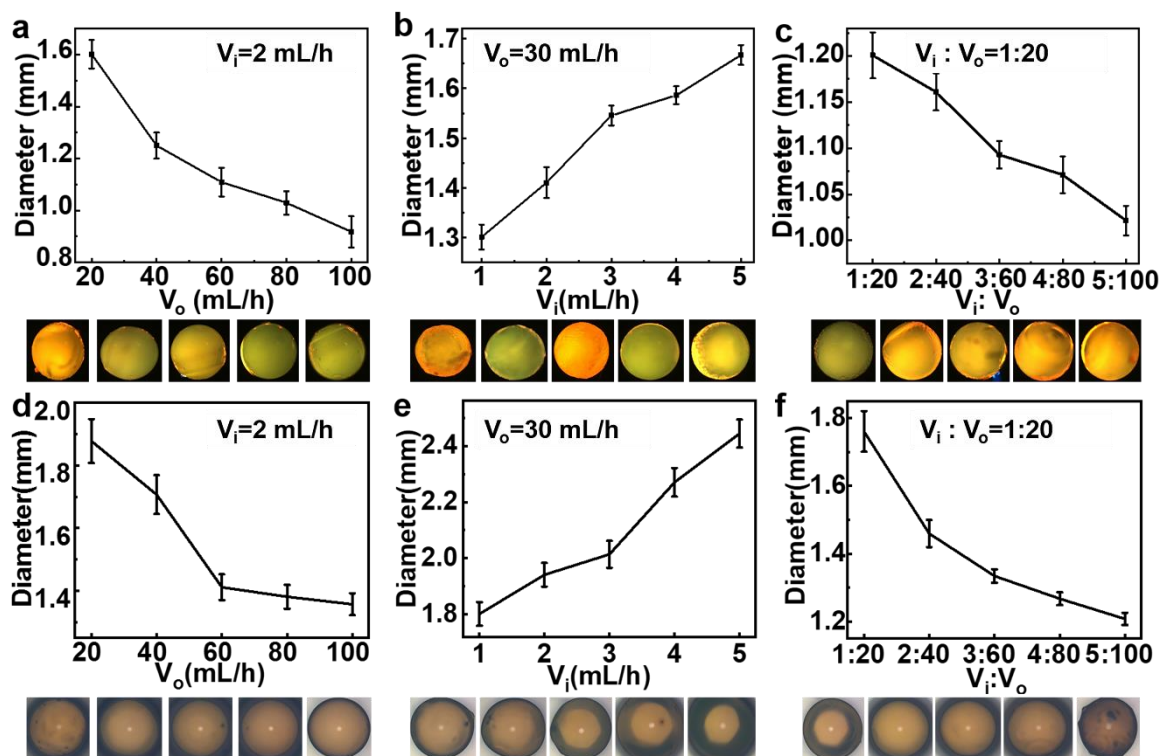

**Figure S6.** Dependence of microbead size on a,d) internal flow rate, b,e) external flow rate, and c,f) internal/external flow rate for a-c) Gel 1 microbeads and d-f) Gel 2 microbeads. Bars represent standard error, for statistical analysis in a-f,  $n = 4$  and field of view (FOV)  $\geq 4$ .

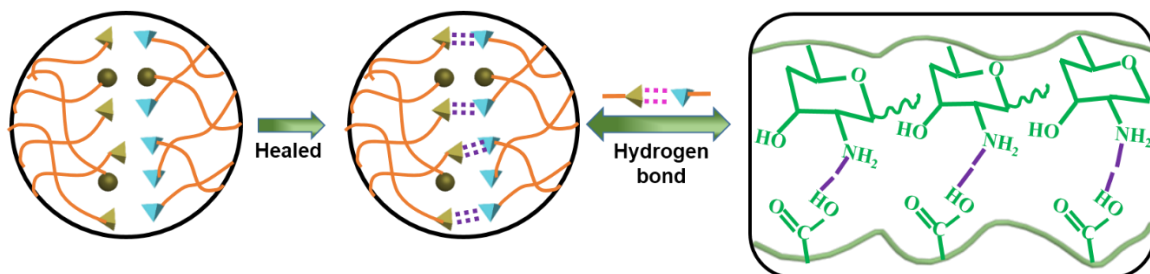

**Figure S7.** Schematic representation of the healing process between Gel 1 and Gel 2 via the hydrogen interaction.

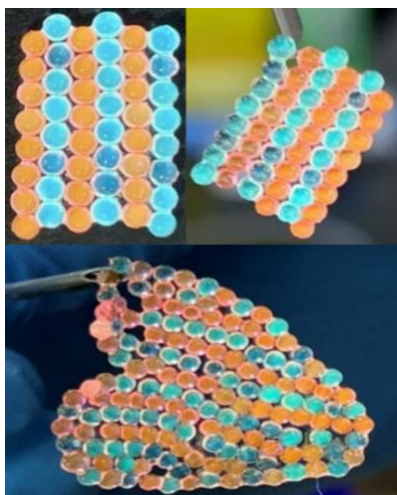

**Figure S8.** Photographs demonstrate that the micro-gel ensembles can remain shape persistent.

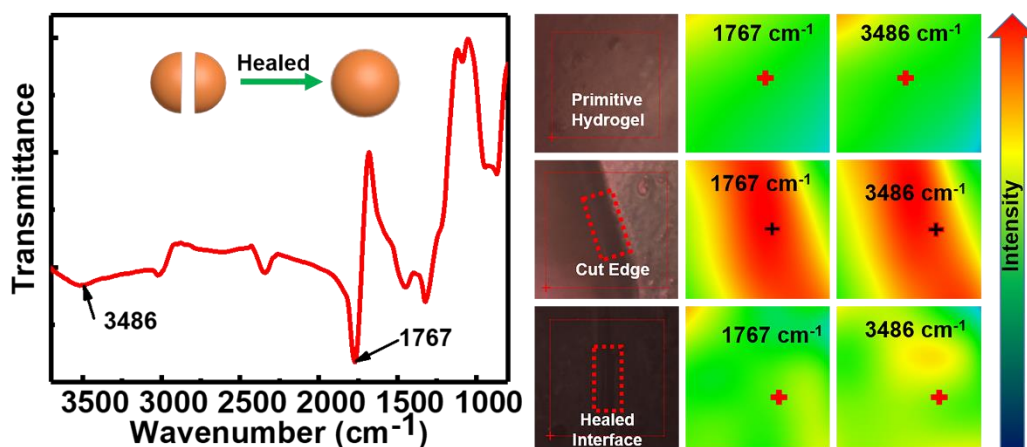

**Figure S9.** IR spectra, Optical images and IR images of Gel 1 before and after self-healing.

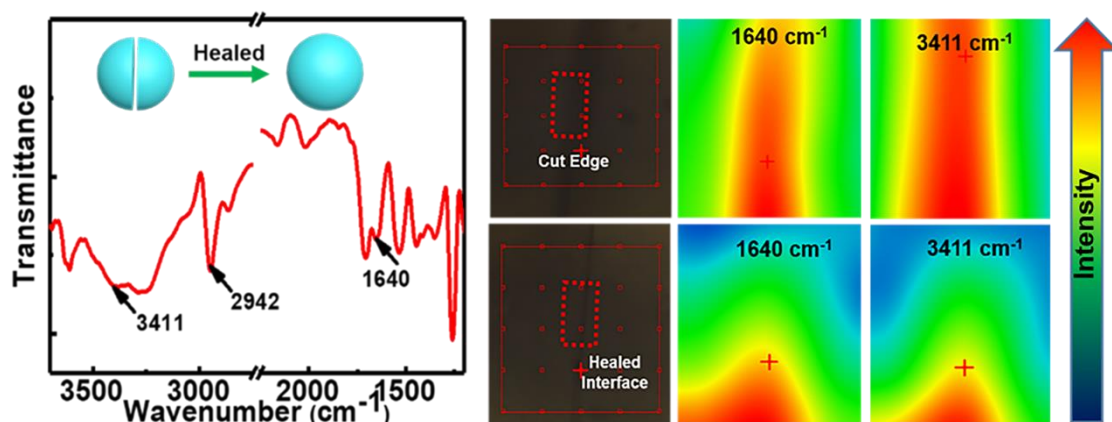

**Figure S10.** IR spectra, Optical images and IR images of Gel 2 before and after self-healing.

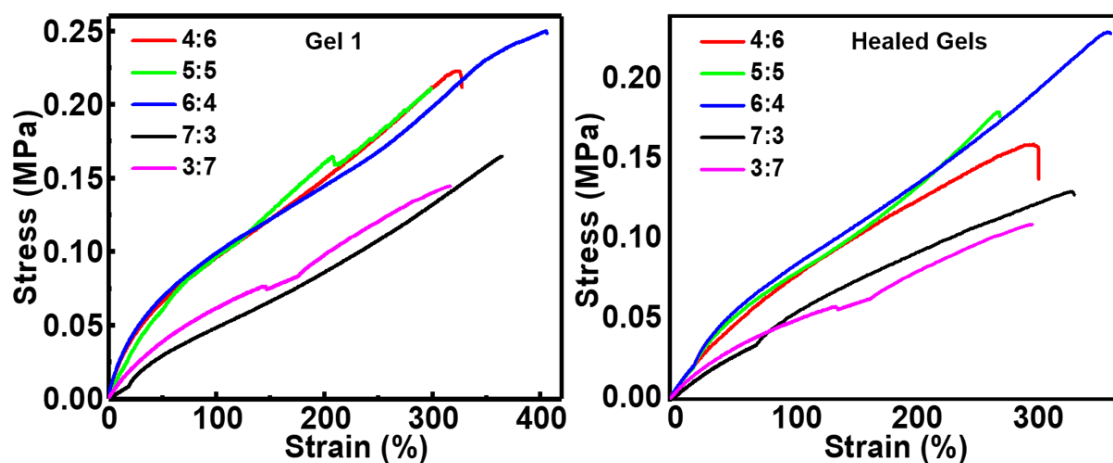

**Figure S11.** Stress-strain curves of Gel 1 and healed Gel 1 obtained from different mass ratios of HPA/AA) at a stretching rate of 0.2 mm/s. For statistical analysis,  $n = 3$ .

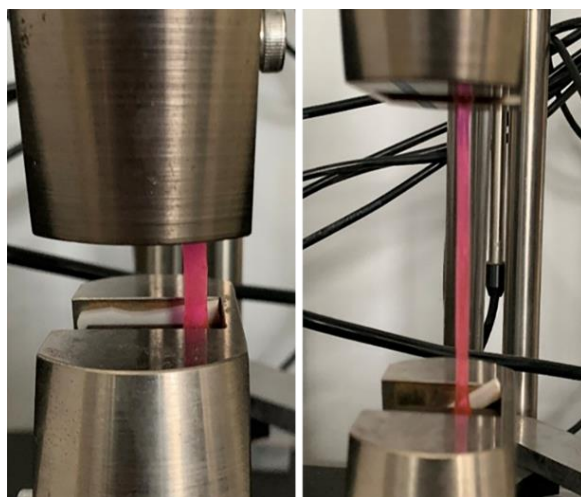

**Figure S12.** Photographs demonstrating the good mechanical properties of Gel 1.

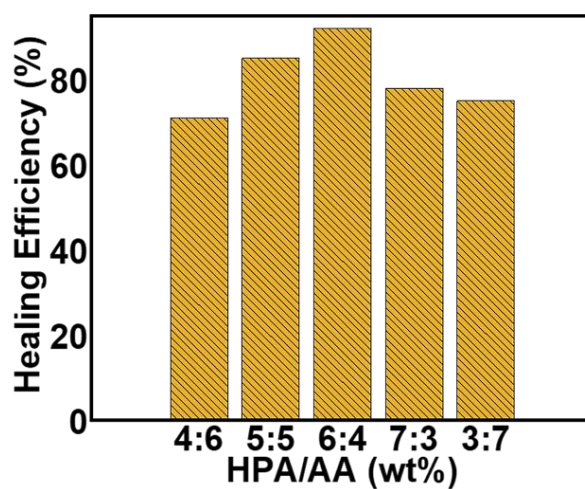

**Figure S13.** Self-healing efficiency of Gel 1 at different mass ratios (HPA:AA).



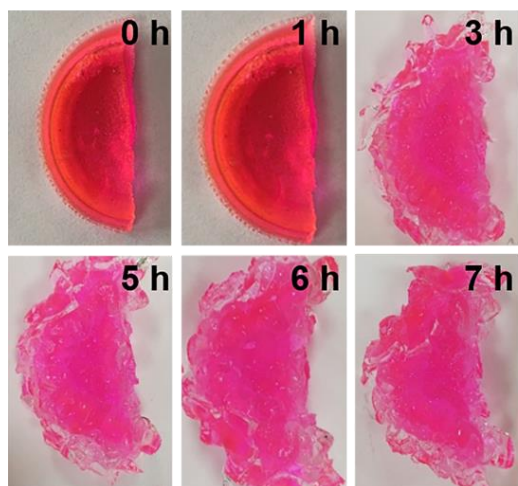

**Figure S14.** Swelling performance of Gel 1 in different time periods.

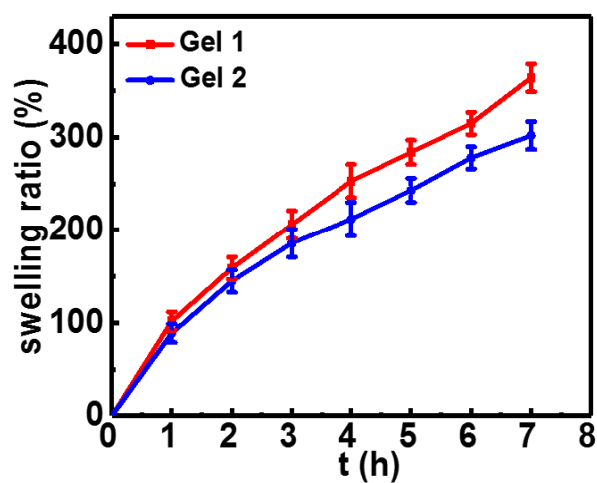

**Figure S15.** Swelling performance curves of Gel 1 and Gel 2. Bars represent standard error, for statistical analysis,  $n = 3$ .

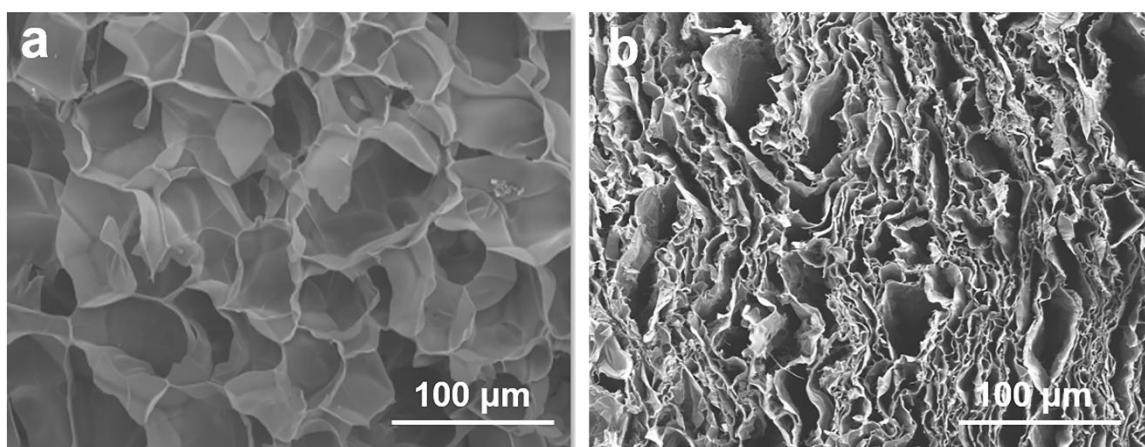

**Figure S16.** SEM images of a) Gel 1 and b) Gel 2.



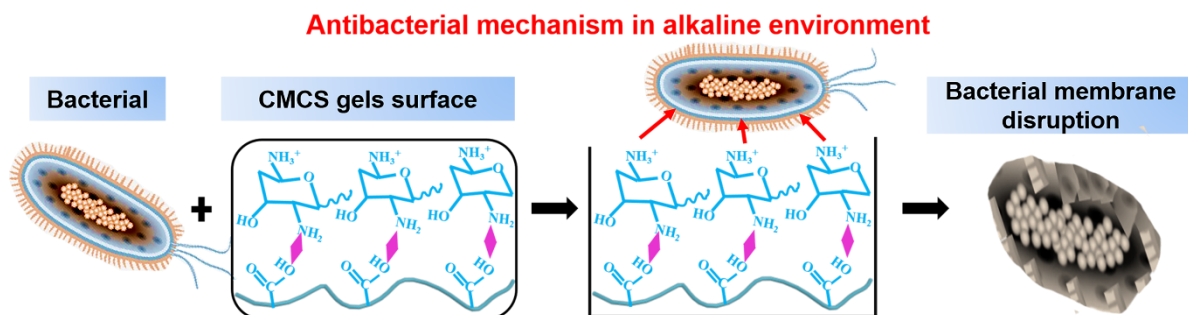

**Figure S17.** Schematic illustration of the antibacterial of micro-gel ensembles.

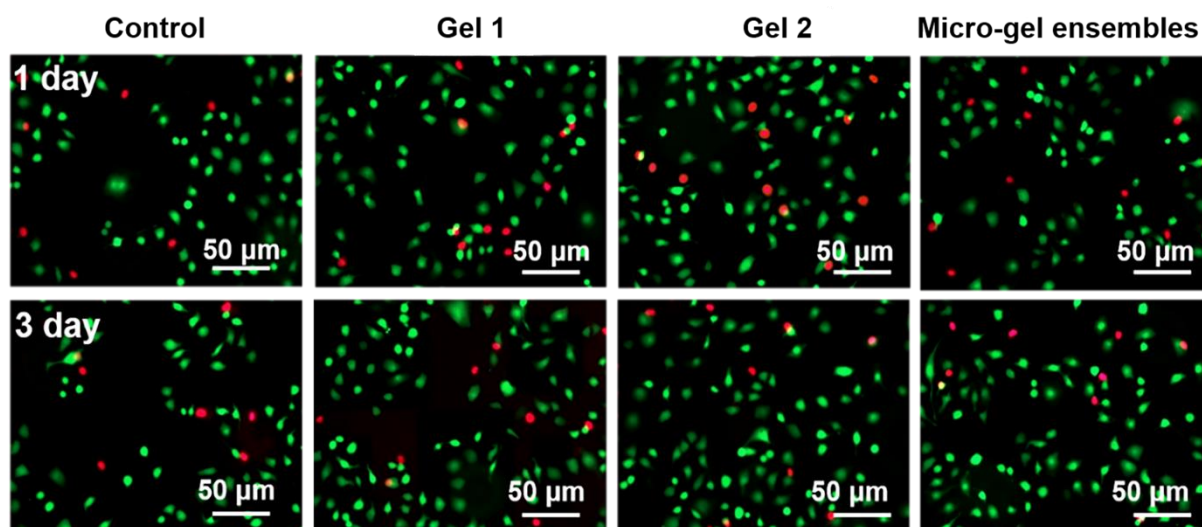

**Figure S18.** Live/Dead staining of L929 fibroblasts on control sample (blank), Gel 1, Gel 2 and micro-gel ensembles. The scale bars are 50  $\mu\text{m}$ ,  $n = 24/\text{group}$ .

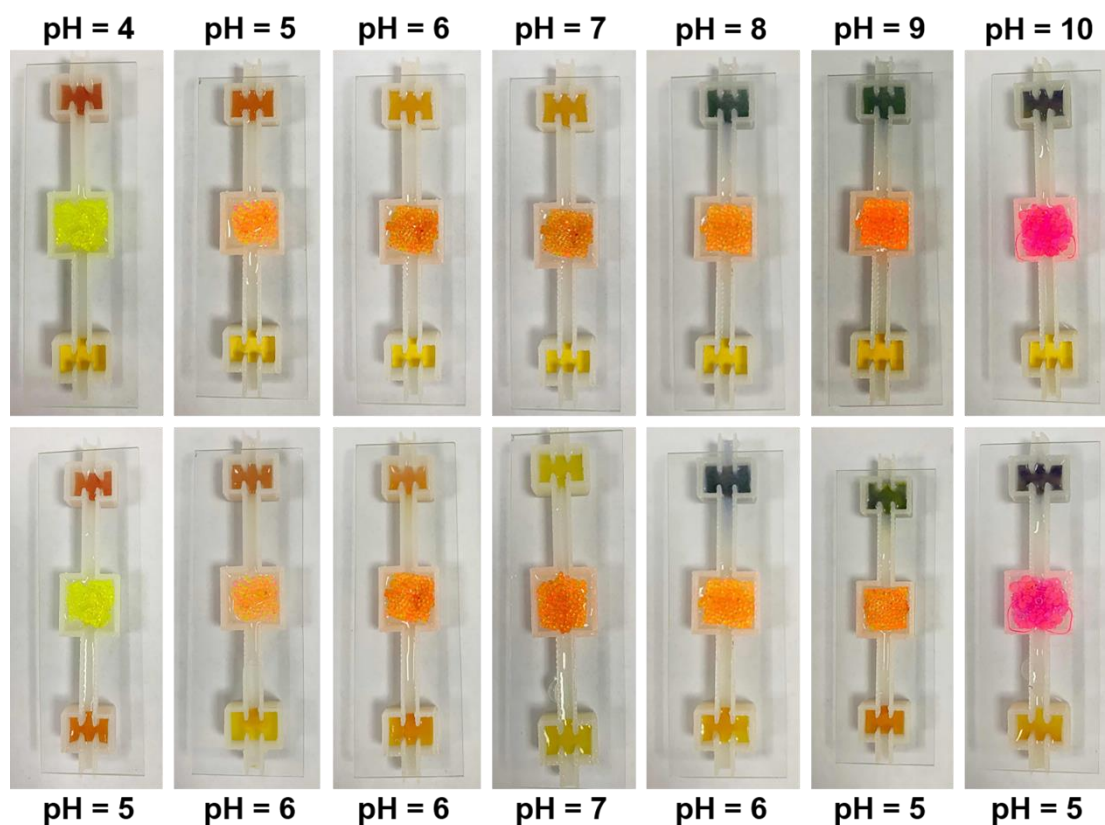

**Figure S19.** Photographs demonstrating the in vitro chip simulates the microenvironment changes of the wound.

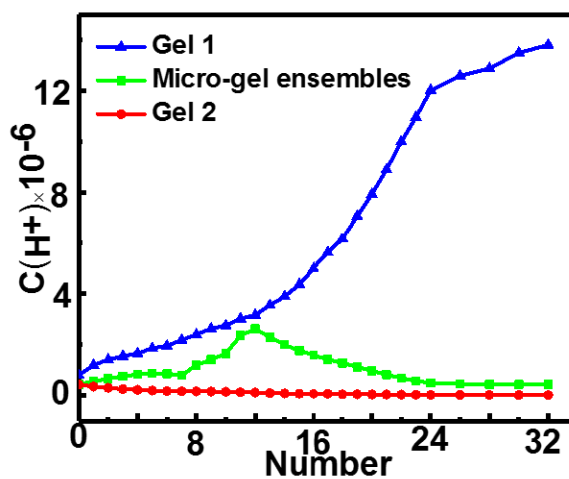

**Figure S20.** The curve of  $H^+$  concentration with the number of gels (Gel 1, micro-gel ensembles, Gel 2).

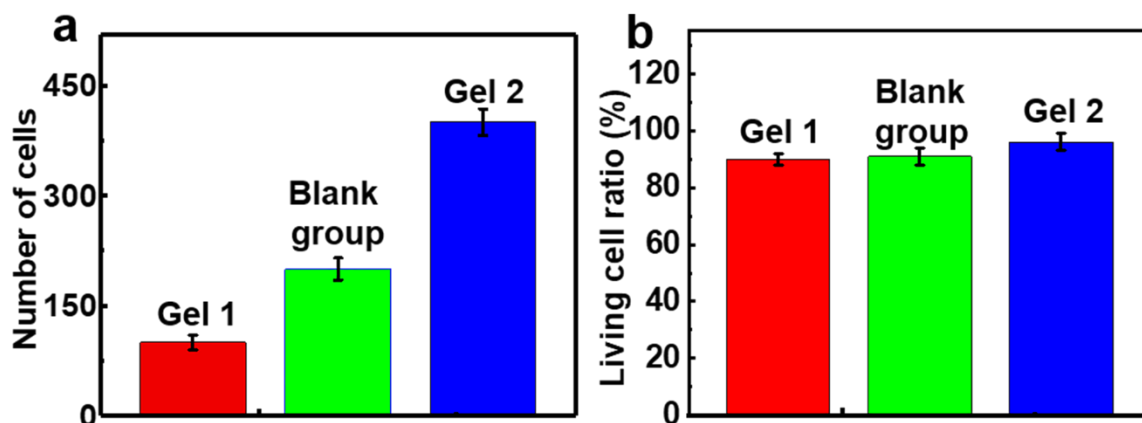

**Figure S21.** a) The number of fibroblasts and b) living cell ration on wounds treated with different materials. Bars represent standard error, for statistical analysis in a, b,  $n = 24$ .

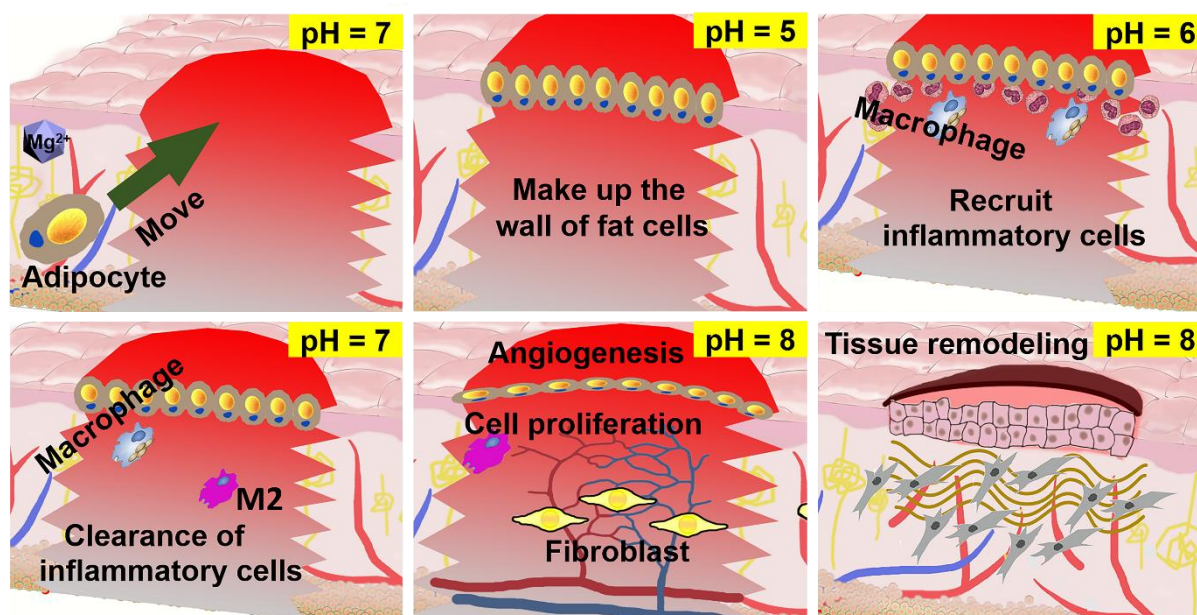

**Figure S22.** Schematic illustration of wound healing process.

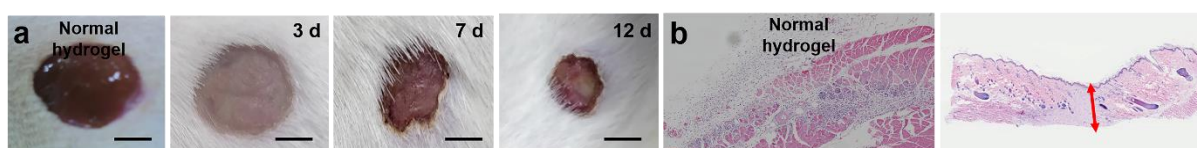

**Figure S23.** a) Digital photographs of representative skin wound healing processes in rats treated with normal hydrogel. b) Microscopy images of granulation growth for normal hydrogel group by H&E. The scale bars are 1 cm,  $n = 7$ /group.

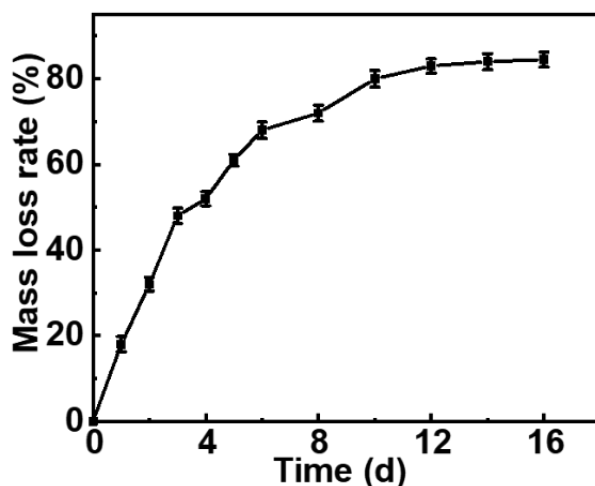

**Figure S24.** In vitro degradation curve of Gel 2. Gel 2 gradually lost mass with time. The mass loss on the first day was about 20% of the total mass. After 16 days of degradation, the mass loss of Gel 2 reached 87%. Bars represent standard error, for statistical analysis,  $n = 3$ .

**Table S1.** The relationship between the internal and external flow rate and the size of hydrogel microsbeads.

| $V_i = 2\text{mL/h}$ |                     | $V_o = 30\text{mL/h}$ |                     | $V_i : V_o = 1:20$ |                     |
|----------------------|---------------------|-----------------------|---------------------|--------------------|---------------------|
| $V_o$ (mL/h)         | D ( $\mu\text{m}$ ) | $V_i$ (mL/h)          | D ( $\mu\text{m}$ ) | $V_i : V_o = 1:20$ | D ( $\mu\text{m}$ ) |
| 20                   | 1602                | 1                     | 1301                | 1:20               | 1200                |
| 40                   | 1250                | 2                     | 1410                | 2:40               | 1160                |
| 60                   | 1109                | 3                     | 1545                | 3:60               | 1092                |
| 80                   | 1029                | 4                     | 1586                | 4:80               | 1071                |
| 100                  | 917                 | 5                     | 1667                | 5:100              | 1021                |

**Table S2.** Relationship between different mass ratios (HPA:AA) and healing efficiency of Gel 1 before and after healing.

| Ration (HPA:AA wt/wt) | Before the healing (MPa) | After healing (MPa) | Healing efficiency (%) |
|-----------------------|--------------------------|---------------------|------------------------|
| 4:6                   | 0.223                    | 0.16                | 71                     |
| 5:5                   | 0.21                     | 0.18                | 85                     |
| 6:4                   | 0.25                     | 0.23                | 92                     |
| 7:3                   | 0.165                    | 0.12                | 78                     |
| 3:7                   | 0.145                    | 0.11                | 75                     |

**Table S3.** Swelling performance of Gel 1 in different time periods.

| Time (h)           | 0 | 1   | 2   | 3   | 4   | 5   | 6   | 7   |
|--------------------|---|-----|-----|-----|-----|-----|-----|-----|
| Swelling ratio (%) | 0 | 102 | 159 | 206 | 253 | 284 | 315 | 364 |

**Table S4.** Swelling performance of Gel 2 in different time periods.

| Time (h)           | 0 | 1  | 2   | 3   | 4   | 5   | 6   | 7   |
|--------------------|---|----|-----|-----|-----|-----|-----|-----|
| Swelling ratio (%) | 0 | 89 | 145 | 186 | 212 | 243 | 278 | 302 |

**Table S5.** The relationship of H<sup>+</sup> concentration with the number of gels (Gel 1, Gel 2, Micro-gel ensembles).

|                     | Number                      | 4                  | 8                  | 12                 | 16                 | 20                 | 24                 | 28                 | 32                 |
|---------------------|-----------------------------|--------------------|--------------------|--------------------|--------------------|--------------------|--------------------|--------------------|--------------------|
| Gel 1               | pH                          | 6.5                | 6.1                | 5.8                | 5.6                | 5.3                | 5.1                | 5                  | 4.9                |
|                     | C <sub>H</sub> <sup>+</sup> | 10 <sup>-6.5</sup> | 10 <sup>-6.1</sup> | 10 <sup>-5.8</sup> | 10 <sup>-5.6</sup> | 10 <sup>-5.3</sup> | 10 <sup>-5.1</sup> | 10 <sup>-5</sup>   | 10 <sup>-4.9</sup> |
| Gel 2               | pH                          | 7.5                | 7.8                | 8                  | 8.3                | 8.9                | 9.1                | 9.5                | 9.7                |
|                     | C <sub>H</sub> <sup>+</sup> | 10 <sup>-7.5</sup> | 10 <sup>-7.8</sup> | 10 <sup>-8</sup>   | 10 <sup>-8.3</sup> | 10 <sup>-8.9</sup> | 10 <sup>-9.1</sup> | 10 <sup>-9.5</sup> | 10 <sup>-9.7</sup> |
| Micro-gel ensembles | pH                          | 6.8                | 6.5                | 6.1                | 6.8                | 7.4                | 7.5                | 7.2                | 7.2                |
|                     | C <sub>H</sub> <sup>+</sup> | 10 <sup>-6.8</sup> | 10 <sup>-6.5</sup> | 10 <sup>-6.1</sup> | 10 <sup>-6.8</sup> | 10 <sup>-7.4</sup> | 10 <sup>-7.5</sup> | 10 <sup>-7.2</sup> | 10 <sup>-7.2</sup> |
